# Supplementary material for: Sleep Duration and Waking Activities in Relation to the National Sleep Foundation’s Recommendations: An Analysis of US Population Sleep Patterns from 2015 to 2017
Source: MDPI journal article supplement (doi:10.3390/ijerph18116154), 2021-06-07
Supplement: s1 [file s1]

**Table S1.** Comparison of duration of wake activities between weekdays and weekends.

| <b>Wake activity</b>                           | <b>Weighted average duration in minutes (standard error)</b> |             | <b><i>P</i></b> |
|------------------------------------------------|--------------------------------------------------------------|-------------|-----------------|
|                                                | Weekdays                                                     | Weekends    |                 |
| Work                                           | 251.6 (2.3)                                                  | 72.2 (1.5)  | <0.001          |
| Socialising                                    | 251.4 (1.9)                                                  | 341.4 (1.9) | <0.001          |
| TV watching                                    | 150.9 (1.4)                                                  | 199.4 (1.7) | <0.001          |
| Screen time                                    | 162.7 (1.6)                                                  | 210.6 (1.6) | <0.001          |
| Travel                                         | 72.6 (0.7)                                                   | 70.2 (0.8)  | 0.035           |
| Personal care (excluding sleep)                | 47.6 (0.5)                                                   | 44.0 (0.5)  | <0.001          |
| Household activities                           | 101.8 (1.3)                                                  | 128.5 (1.2) | <0.001          |
| Eating and Drinking                            | 61.4 (0.5)                                                   | 70.0 (0.5)  | <0.001          |
| Sport, exercise and recreation                 | 17.8 (0.5)                                                   | 24.8 (0.7)  | <0.001          |
| Consumer purchases                             | 18.3 (0.4)                                                   | 29.3 (0.5)  | <0.001          |
| Education                                      | 33.2 (1.1)                                                   | 12.2 (0.8)  | <0.001          |
| Care for household members                     | 27.0 (0.5)                                                   | 25.0 (0.5)  | 0.003           |
| Care for non-household members                 | 7.7 (0.3)                                                    | 9.0 (0.4)   | 0.028           |
| Religious and spiritual activities             | 4.8 (0.3)                                                    | 18.8 (0.5)  | <0.001          |
| Volunteer activities                           | 7.7 (0.4)                                                    | 9.8 (0.5)   | 0.003           |
| Telephone calls                                | 6.2 (0.2)                                                    | 6.0 (0.3)   | 0.440           |
| Household services                             | 1.2 (0.1)                                                    | 0.6 (0.1)   | <0.001          |
| Professional and special care services         | 6.2 (0.3)                                                    | 2.3 (0.2)   | <0.001          |
| Government services and civic responsibilities | 0.6 (0.2)                                                    | 0.1 (0.0)   | 0.005           |
